# Supplementary material for: Acetate and Butyrate Improve β-cell Metabolism and Mitochondrial Respiration under Oxidative Stress
Source: PubMed Central journal article supplement (PMC7073211; doi:10.3390/ijms21041542), 2020-02-24
Supplement: ijms-21-01542-s001.pdf [file ijms-21-01542-s001.pdf]

## Supplementary

**Supplementary Table S1.** Islet and donor data.

| Islet preparation              | 1                        | 2           | 3                 | 4               | 5               |
|--------------------------------|--------------------------|-------------|-------------------|-----------------|-----------------|
| Donor age (years)              | 56                       | 52          | 47                | 71              | 52              |
| Donor sex (M/F)                | F                        | F           | F                 | M               | F               |
| Donor BMI (kg/m <sup>2</sup> ) | 19.4                     | 22.7        | 31                | 29              | 26              |
| Donor blood glucose            | 90 mg/dL                 | 122 mg/dL   | Non-diabetic      | Non-diabetic    | Non-diabetic    |
| Origin/source of islets        | Italy                    | France      | The Netherlands   | The Netherlands | The Netherlands |
| Islet isolation centre         | ECIT center <sup>1</sup> | ECIT center | LUMC <sup>2</sup> | LUMC            | LUMC            |
| Donor cause of death           | Cerebral bleeding        | Trauma      | Non-cardiac       | Non-cardiac     | Cardiac         |
| Estimated purity (%)           | 70                       | 80          | 65                | 40              | 65              |
| Estimated viability (%)        | 95                       | 90          | >80               | >80             | >80             |

<sup>1</sup> ECIT: European Consortium for Islet Transplantation. <sup>2</sup> LUMC: Leiden University Medical Center.

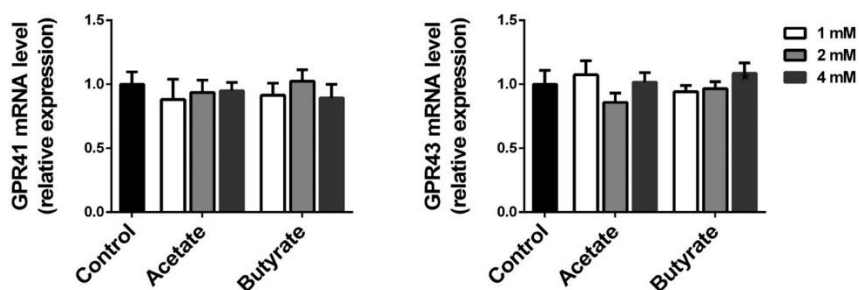

**Supplementary Figure S1.** The expressions of GPR41 and GPR43 in MIN6 cells were investigated by qRT-PCR. There are no significant difference in mRNA level of GPR41 and GPR43 before and after exposure to acetate and butyrate. Results are plotted as mean  $\pm$  SEM (n=5). The statistical differences were quantified using one-way ANOVA analysis.
